# Supplementary material for: Position Effects of Metal Nanoparticles on the Performance of Perovskite Light-Emitting Diodes
Source: MDPI journal article supplement (doi:10.3390/nano11040993), 2021-04-13
Supplement: s1 [file s1]

## Supplementary Information

# Position Effects of Metal Nanoparticles on the Performance of Perovskite Light-Emitting Diodes

Chen-Min Yang <sup>1</sup> and Fang-Chung Chen <sup>1,2,3,\*</sup>

<sup>1</sup> Department of Photonics, College of Electrical and Computer Engineering, National Chiao Tung University, Hsinchu 30010, Taiwan; dennis51025@gmail.com

<sup>2</sup> Center for Emergent Functional Matter Science, National Chiao Tung University, Hsinchu 30010, Taiwan

<sup>3</sup> Department of Photonics, College of Electrical and Computer Engineering, National Yang Ming Chiao Tung University, Hsinchu 30010, Taiwan

\* Correspondence: fcchen@mail.nctu.edu.tw or fcchendop@nycu.nctu.edu.tw

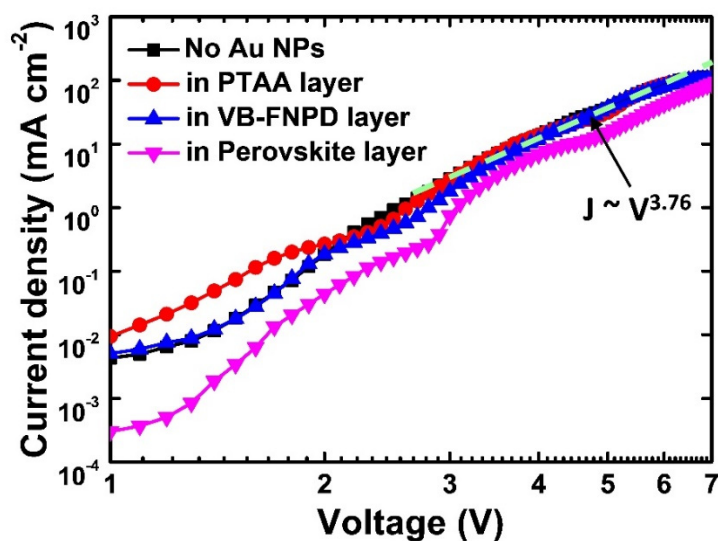

**Figure S1.** The log-log plot of the J-V curves shown in Figure 4. The PeLEDs containing Au NPs at different device locations. The concentration of the NPs was  $5.0 \times 10^{-3} \text{ mg mL}^{-1}$ .

**Table S1.** Differential resistances of the PeLEDs in this study.

| Device        | Rs ( $\Omega$ )    | Rsh ( $\Omega$ )   |
|---------------|--------------------|--------------------|
| No Au NPs     | $6.41 \times 10^2$ | $7.84 \times 10^4$ |
| in PTAA       | $5.53 \times 10^2$ | $4.67 \times 10^4$ |
| in VB-FNPD    | $6.89 \times 10^2$ | $7.14 \times 10^4$ |
| in Perovskite | $4.02 \times 10^2$ | $2.31 \times 10^5$ |
